# Supplementary material for: Magnetic stimulation allows focal activation of the mouse cochlea
Source: eLife journal article supplement (doi:10.7554/elife.76682), 2022-05-24

*Acoustic**Magnetic**Electric***A. Raw data**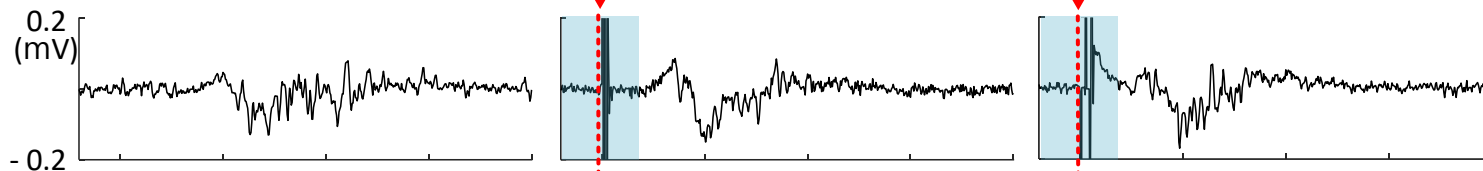**B. After LFP and artifact removal**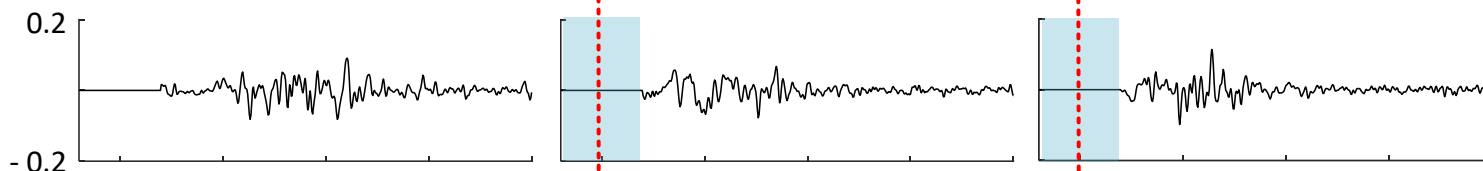**C. aMUA**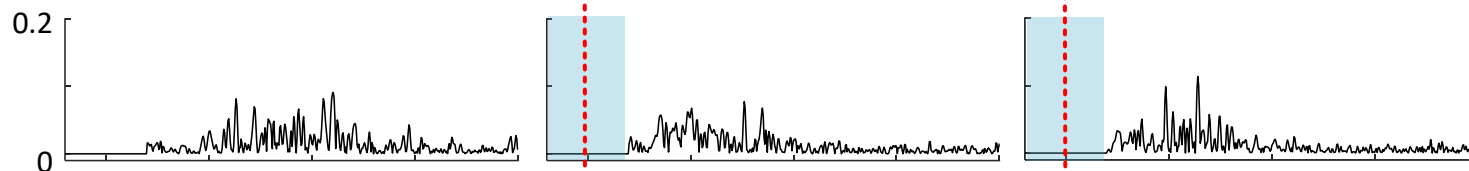**D. Mean aMUA across 30 trials**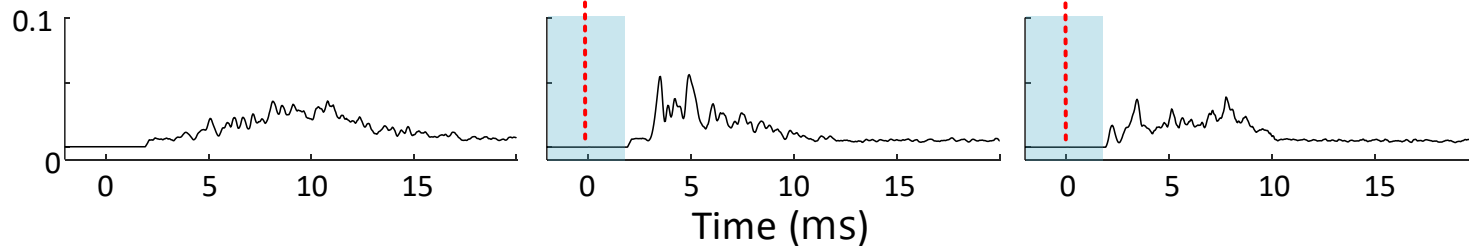

Supplement: supp [file elife_poa_e76682_Figure_2_figure_supplement_1.pdf › elife_poa_e76682_Figure_2_figure_supplement_1.pdf]
