# Supplementary figures and images for: Magnetic stimulation allows focal activation of the mouse cochlea
Source: eLife journal article supplement (doi:10.7554/elife.76682), 2022-05-24

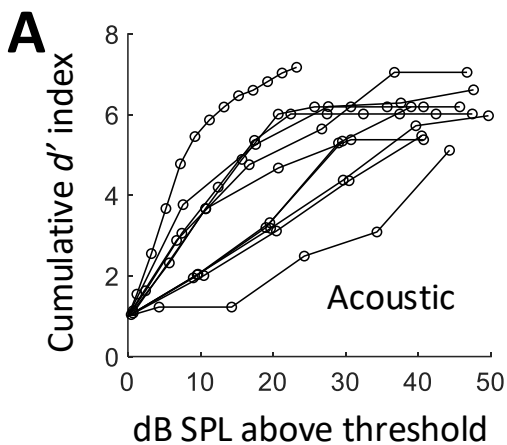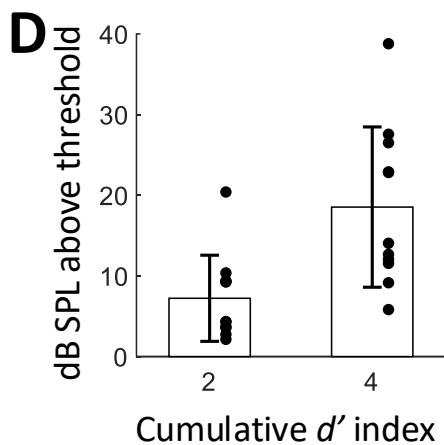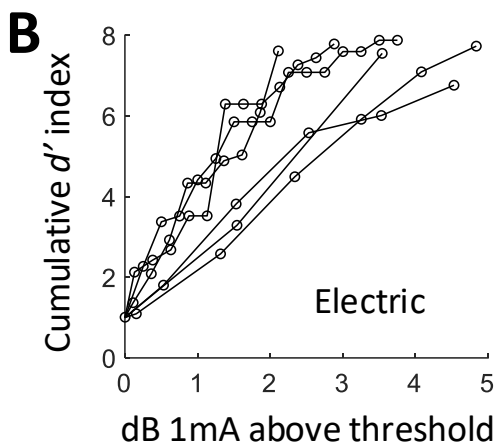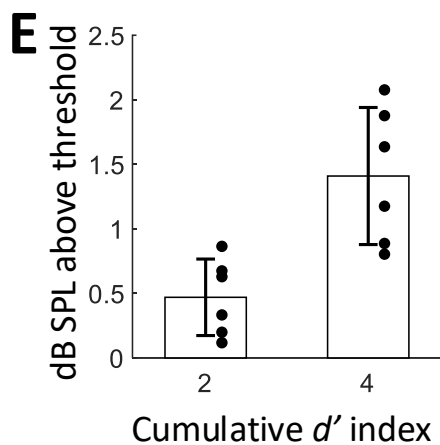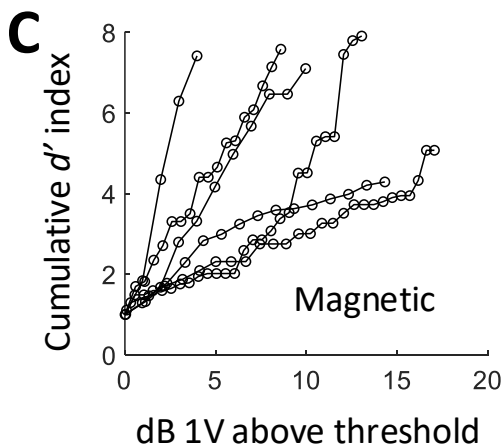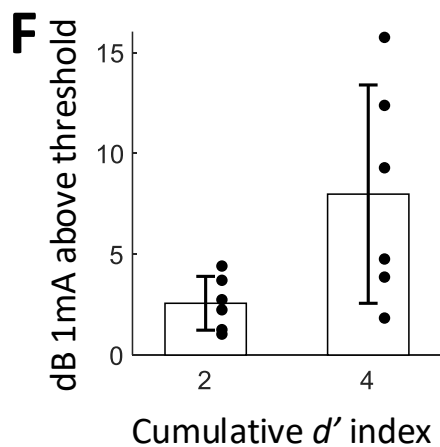

Supplement: supp [file elife_poa_e76682_Figure_2_figure_supplement_2.pdf › elife_poa_e76682_Figure_2_figure_supplement_2.pdf]

*Magnetic*

**A-1**

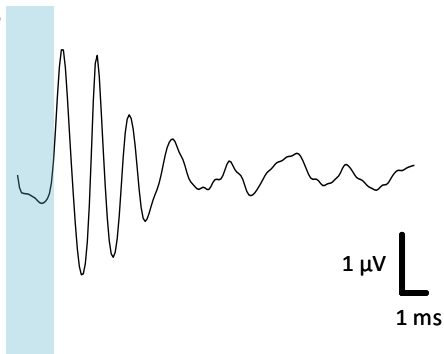

*Electric*

**B-1**

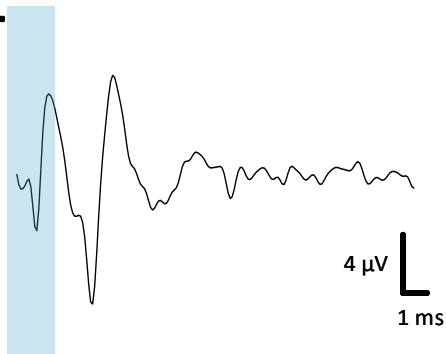

**A-2**

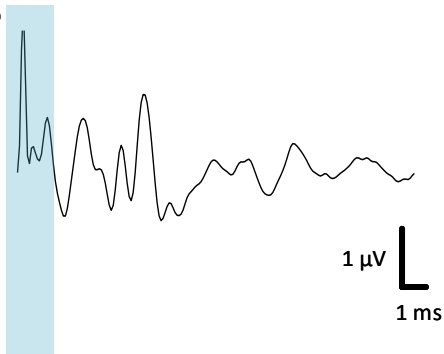

**B-2**

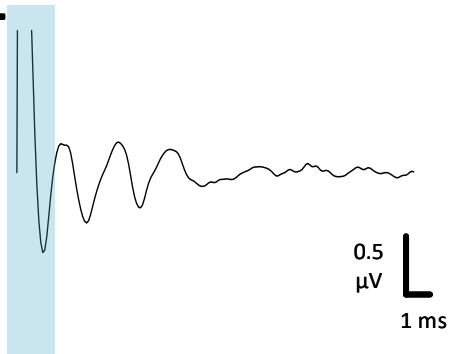

Supplement: supp [file elife_poa_e76682_Figure_3_figure_supplement_1.pdf › elife_poa_e76682_Figure_3_figure_supplement_1.pdf]

## Magnetic

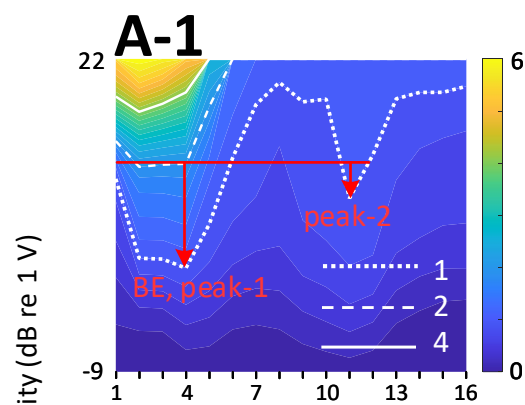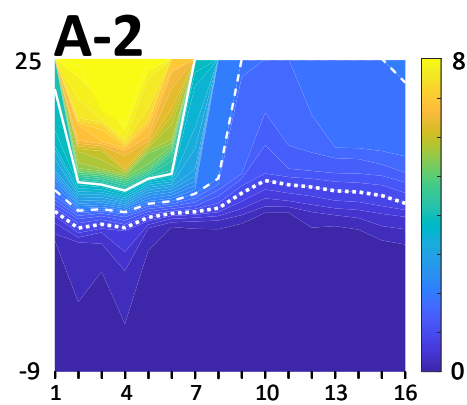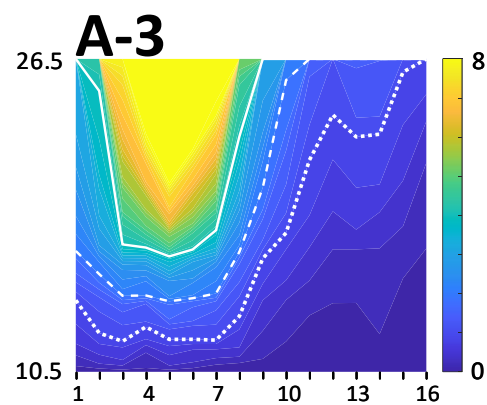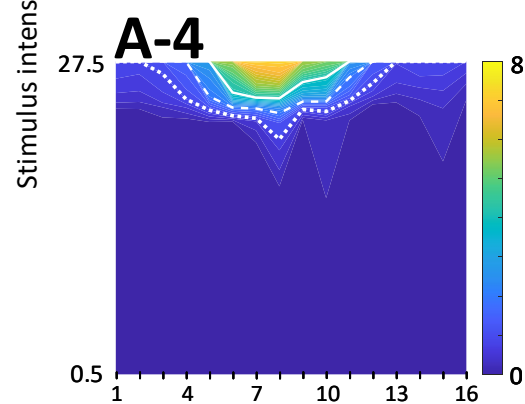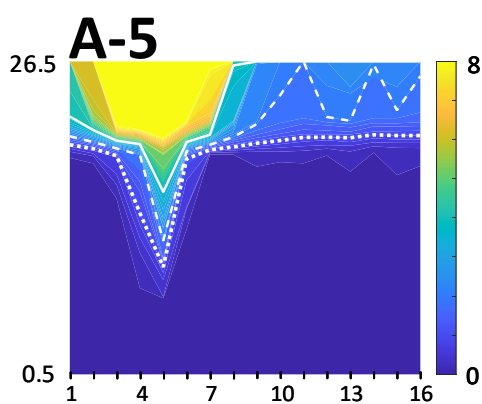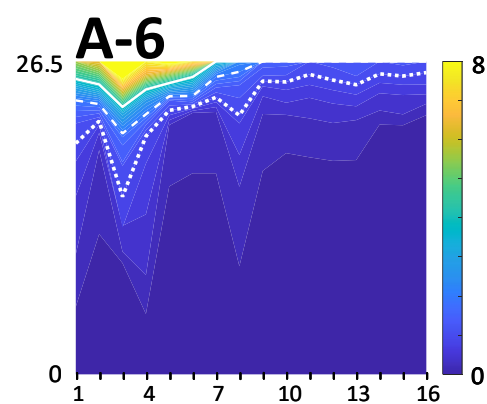

## Electric

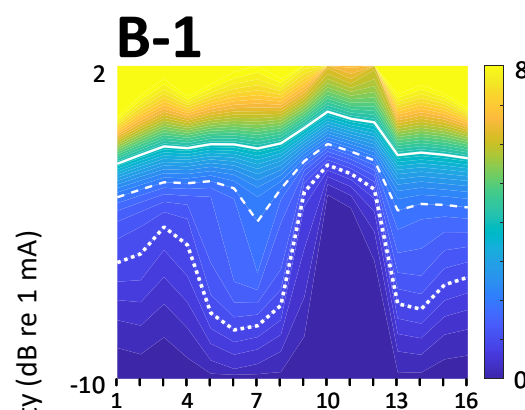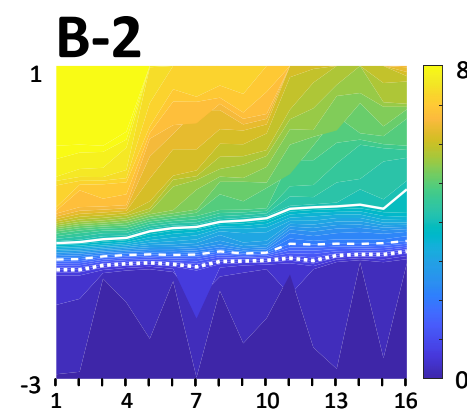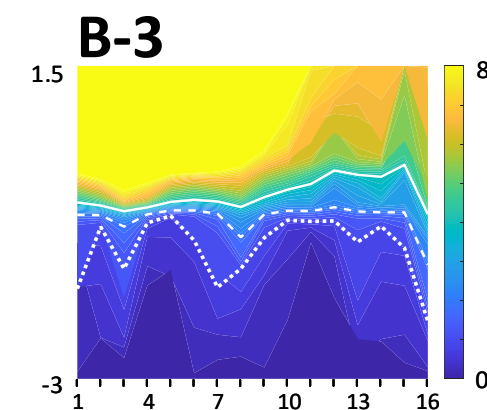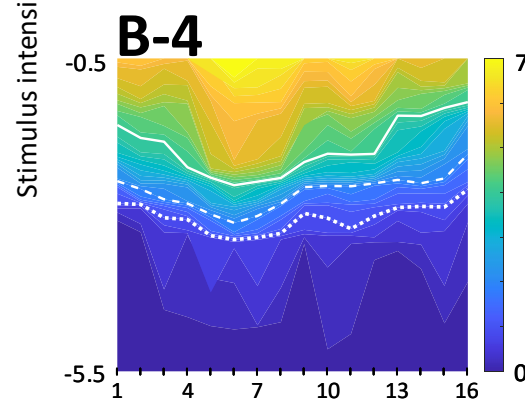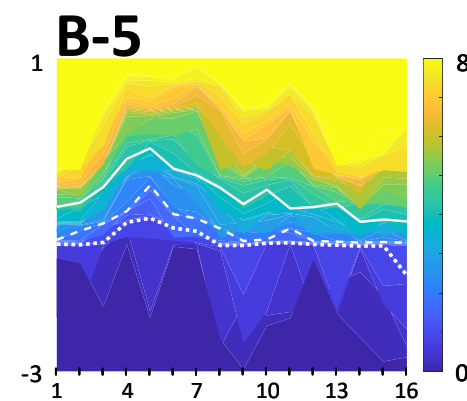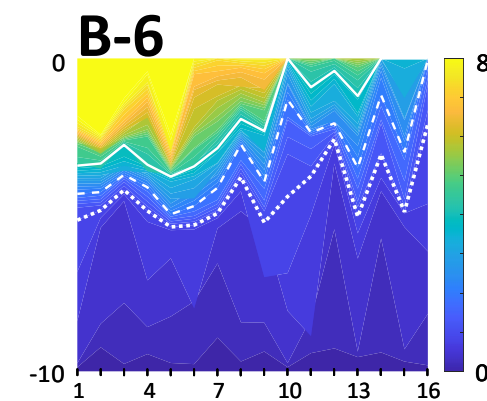

Electrode #

Electrode #

Electrode #

Supplement: supp [file elife_poa_e76682_Figure_4_figure_supplement_1.pdf › elife_poa_e76682_Figure_4_figure_supplement_1.pdf]

## Magnetic

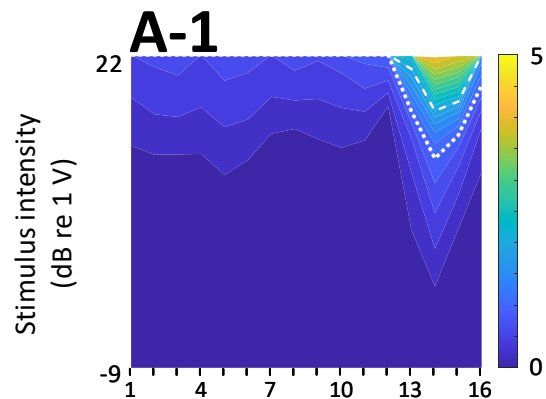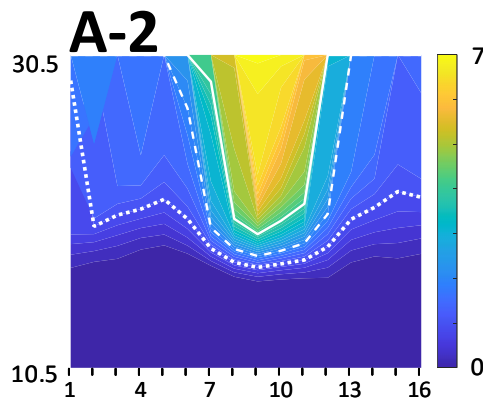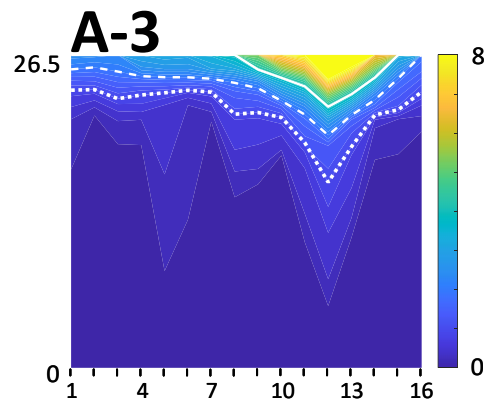

## Electric

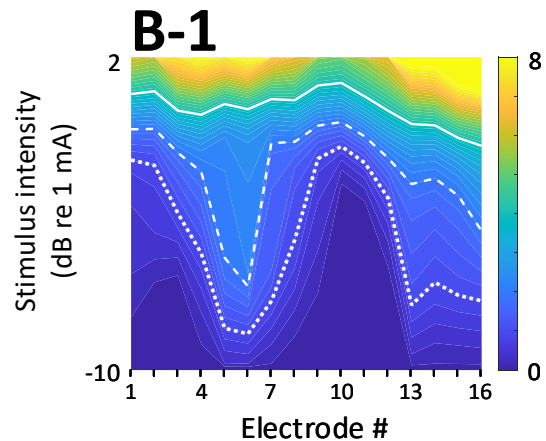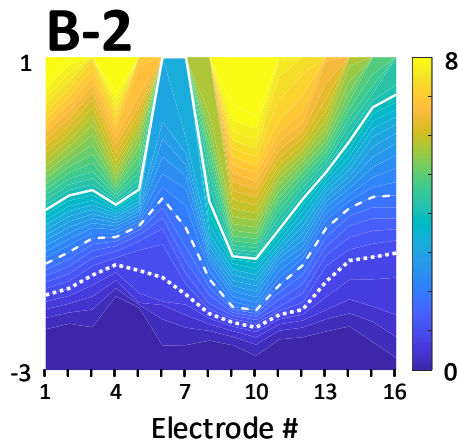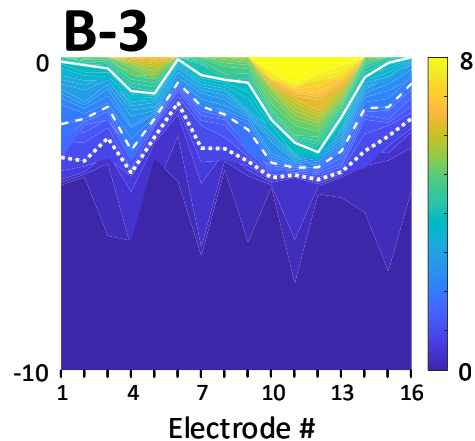

Supplement: supp [file elife_poa_e76682_Figure_4_figure_supplement_2.pdf › elife_poa_e76682_Figure_4_figure_supplement_2.pdf]
